# Supplementary material for: Off-chip passivated-electrode, insulator-based dielectrophoresis (OπDEP)
Source: PubMed Central journal article supplement — Anal Bioanal Chem. 2013 Jun 30;405(21):6657–66. doi: 10.1007/s00216-013-7123-7 (PMC3730152; doi:10.1007/s00216-013-7123-7), 2013-06-30
Supplement: 216_2013_7123_MOESM1_ESM.pdf [file 216_2013_7123_MOESM1_ESM.pdf]

Analytical and Bioanalytical Chemistry

Electronic Supplementary Material

## **Off-chip passivated-electrode, insulator-based dielectrophoresis ( $O\pi$ DEP)**

Phillip Zellner, Tyler Shake, Ali Sahari, Bahareh Behkam, and Masoud Agah

**Video S1.**

DOI 10.1007/s00216-013-7123-7
